# Supplementary material for: Improved Efficiency of Graphene/Si Heterojunction Solar Cells by Optimizing Hydrocarbon Feed Rate
Source: Hindawi journal article supplement (doi:10.1155/2014/359305), 2014-01-01
Supplement: f1 [file 359305.f1.pdf]

**Supplementary Information for:**

# Improved Efficiency of Graphene/Si Heterojunction Solar Cells by Optimizing Hydrocarbon Feed Rate

Zexia Zhang<sup>1</sup>, Tongxiang Cui<sup>1</sup>, Ruitao Lv<sup>1\*</sup>, Hongwei Zhu<sup>1,2</sup>, Kunlin Wang<sup>1</sup>, Dehai Wu<sup>1</sup>, Feiyu Kang<sup>1,3\*</sup>

<sup>1</sup>Key Laboratory of Advanced Materials (MOE), School of Materials Science and Engineering, Tsinghua University, Beijing 100084, China

<sup>2</sup>Center for Nano and Micro Mechanics, Tsinghua University, Beijing 100084, China

<sup>3</sup>Graduate School at Shenzhen, Tsinghua University, Shenzhen, Guangdong Province, 518055, China

\*Correspondence should be addressed to F.Y. Kang; [fykang@tsinghua.edu.cn](mailto:fykang@tsinghua.edu.cn); R.T. Lv; [lvruitao@tsinghua.edu.cn](mailto:lvruitao@tsinghua.edu.cn).

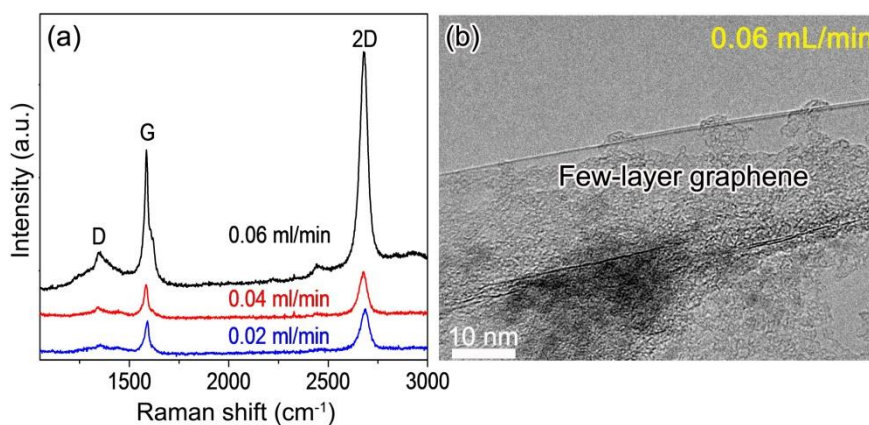

**FIGURE S1:** Raman spectra (a) and HRTEM image (b) of graphene film produced at feed rates of 0.02, 0.04 , 0.06 mL/min

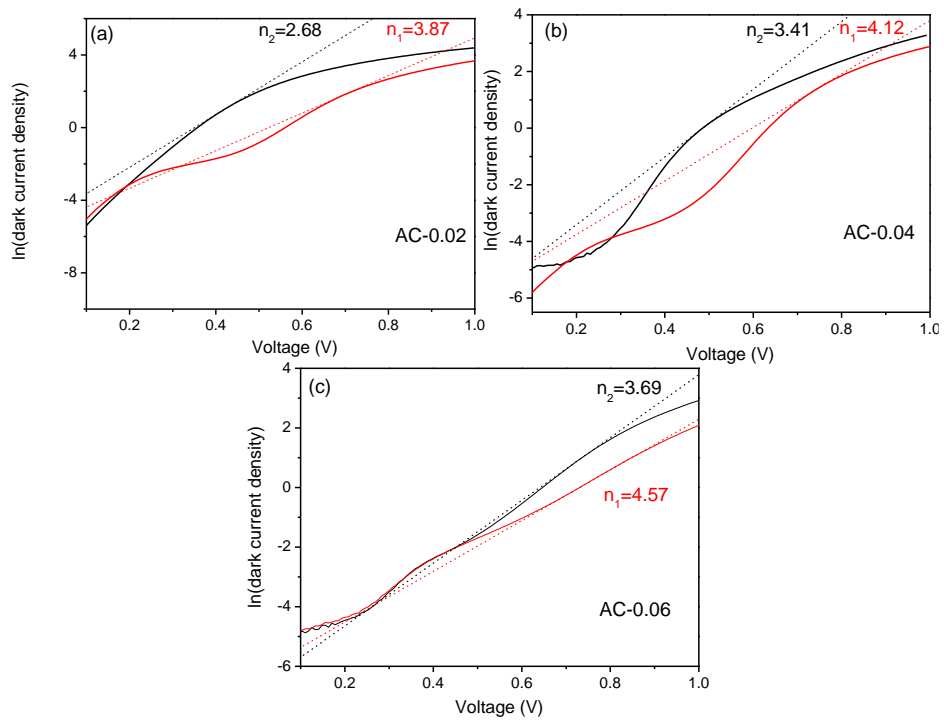

**FIGURE S2:** Plots of  $\ln$  (dark current density) versus voltage showing diode ideality factors of different graphene films before ( $n_1$ ) and after ( $n_2$ )  $\text{HNO}_3$  treatment.(a) AC-0.02, (b) AC-0.04, (c) AC-0.06.

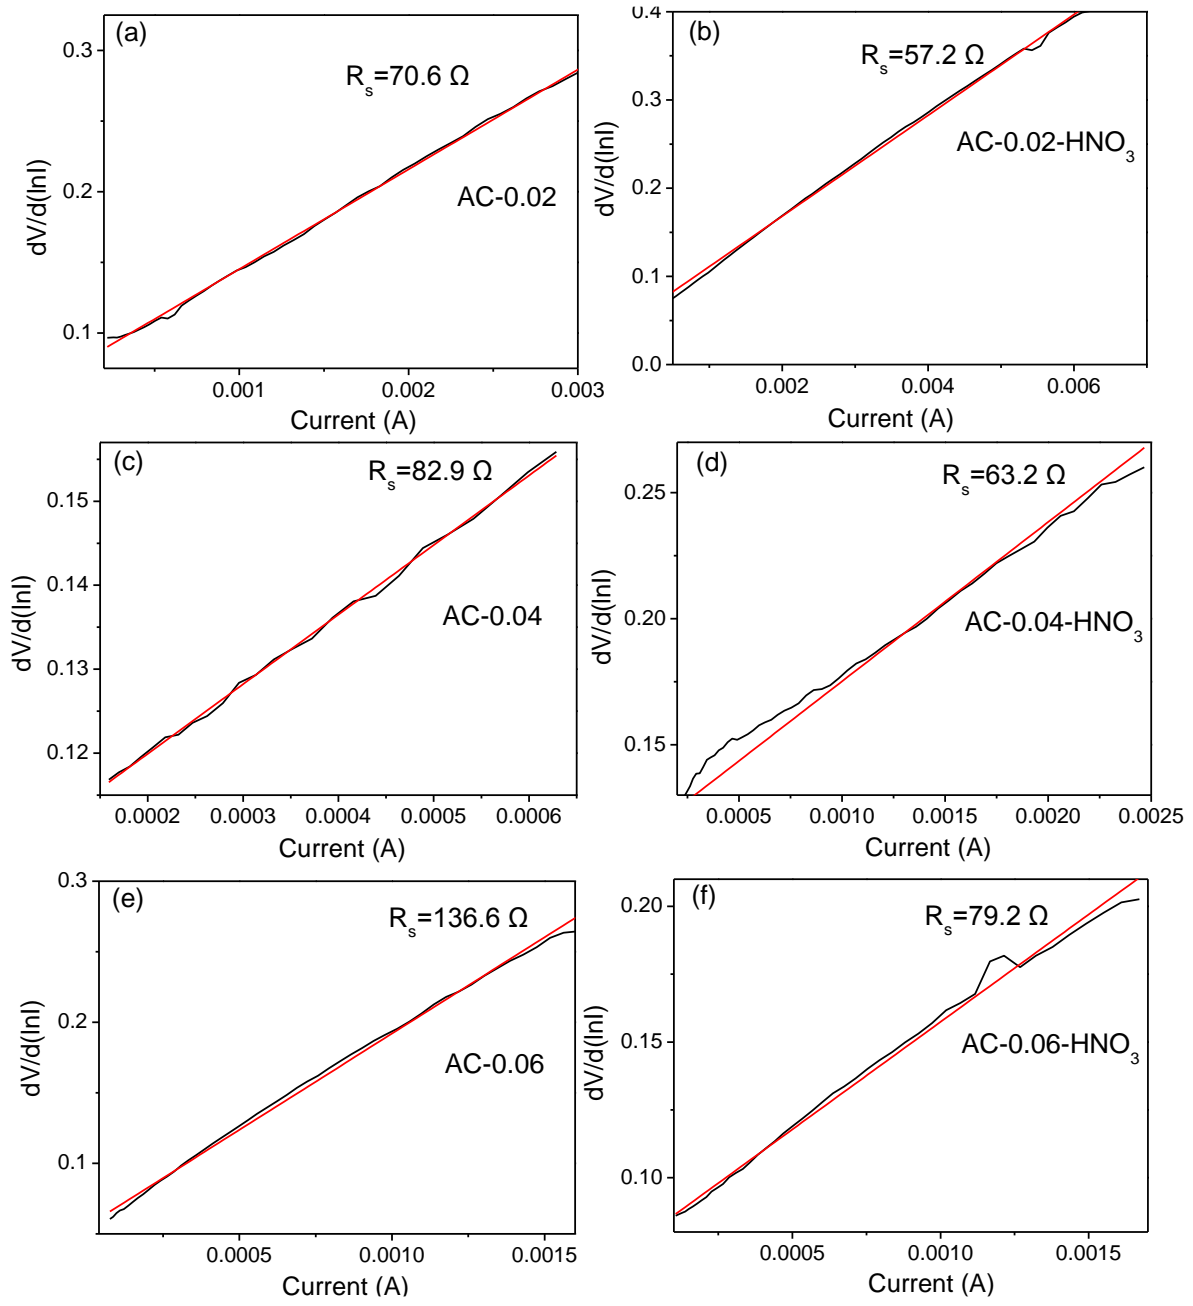

**FIGURE S3:** Linear fit of  $dV/d(\ln I)$  versus  $I$  shows the  $R_s$  of different samples ( $I$  is dark current), (a) AC-0.02, (b) AC-0.02-HNO<sub>3</sub>, (c) AC-0.04, (d) AC-0.04-HNO<sub>3</sub>, (e) AC-0.06, (f) AC-0.06-HNO<sub>3</sub>.
